# Supplementary material for: Genetic dissection of triplicated chromosome 21 orthologs yields varying skeletal traits in Down syndrome model mice
Source: Oxford University Press journal article supplement (doi:10.1242/dmm.049927), 2023-03-20
Supplement: dmm049927supp.pdf [file dmm049927supp.pdf]

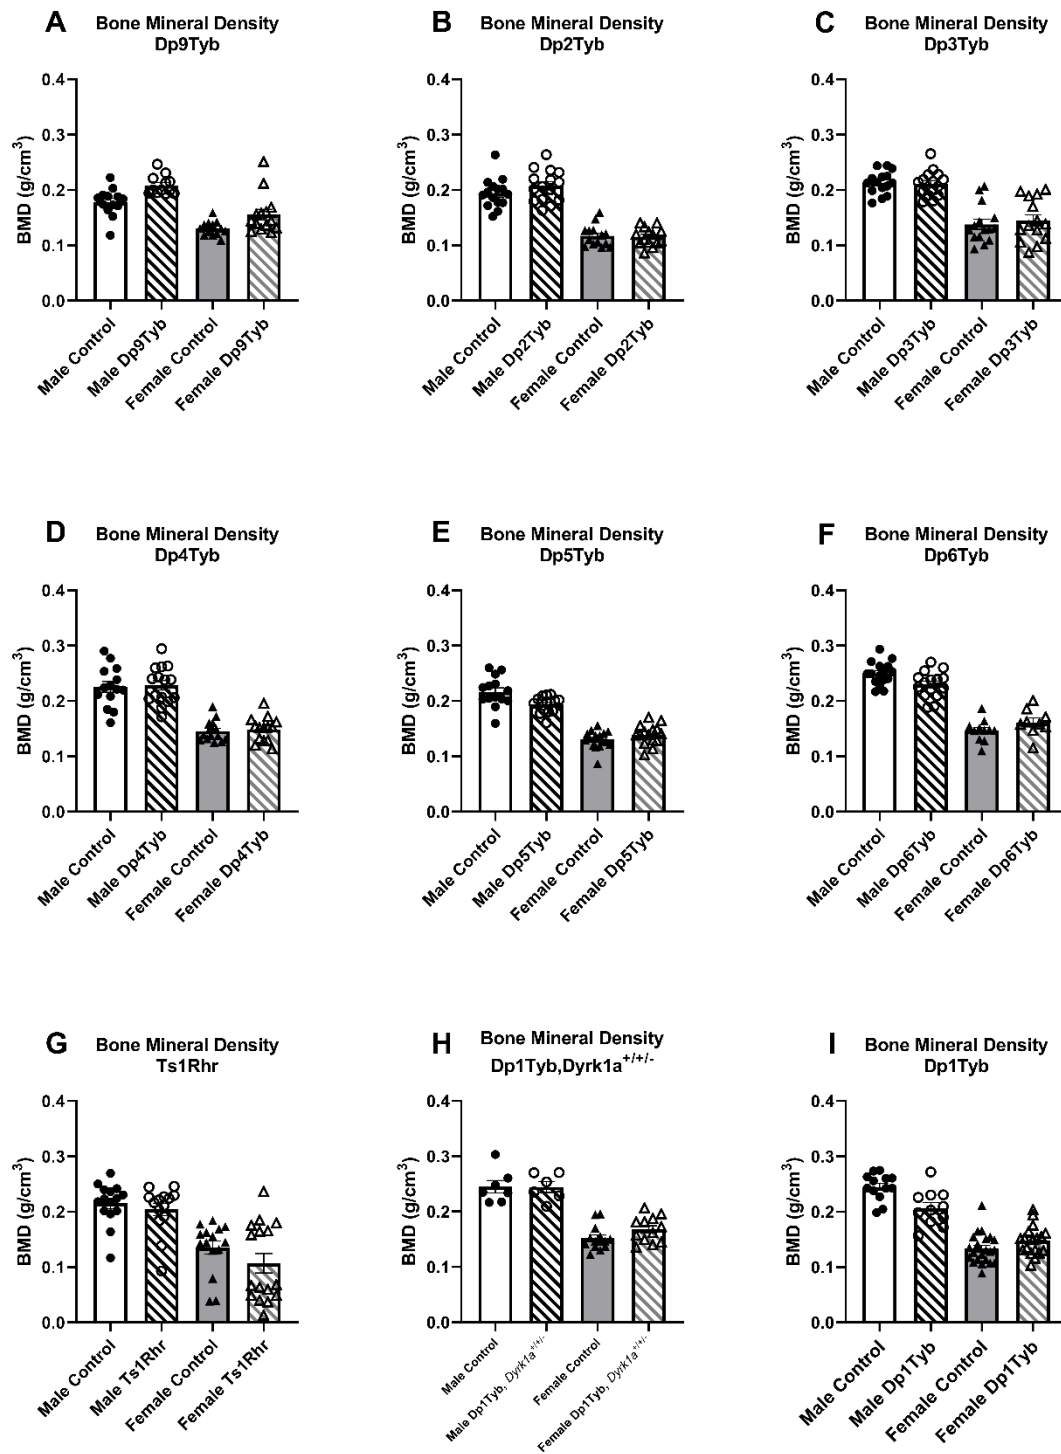

**Fig. S1. Bone mineral density measurements in triplicated (Dp) mouse model and control mice.** Animal numbers are as listed in Tables 1 and 2. Data are mean  $\pm$  SEM. Dp1Tyb data comes from Thomas et al. (2020).

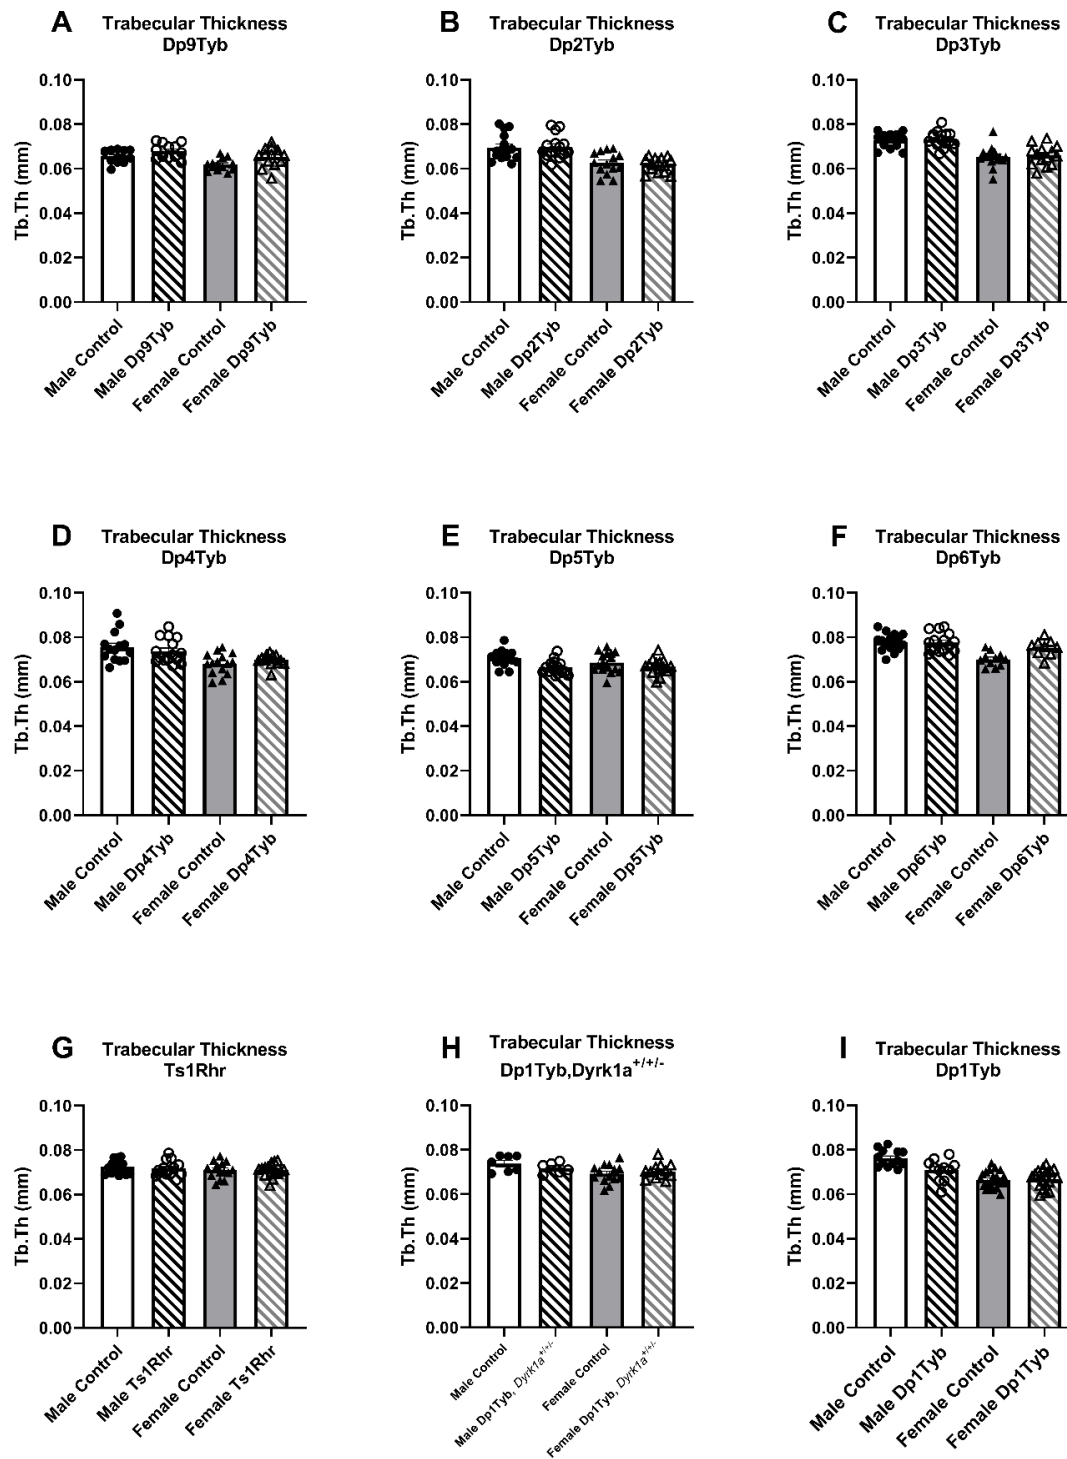

**Fig. S2. Trabecular thickness measurements in triplicated (Dp) mouse models and control mice.** Animal numbers are as listed in Tables 1 and 2. Data are mean  $\pm$  SEM. Dp1Tyb data comes from Thomas et al. (2020).

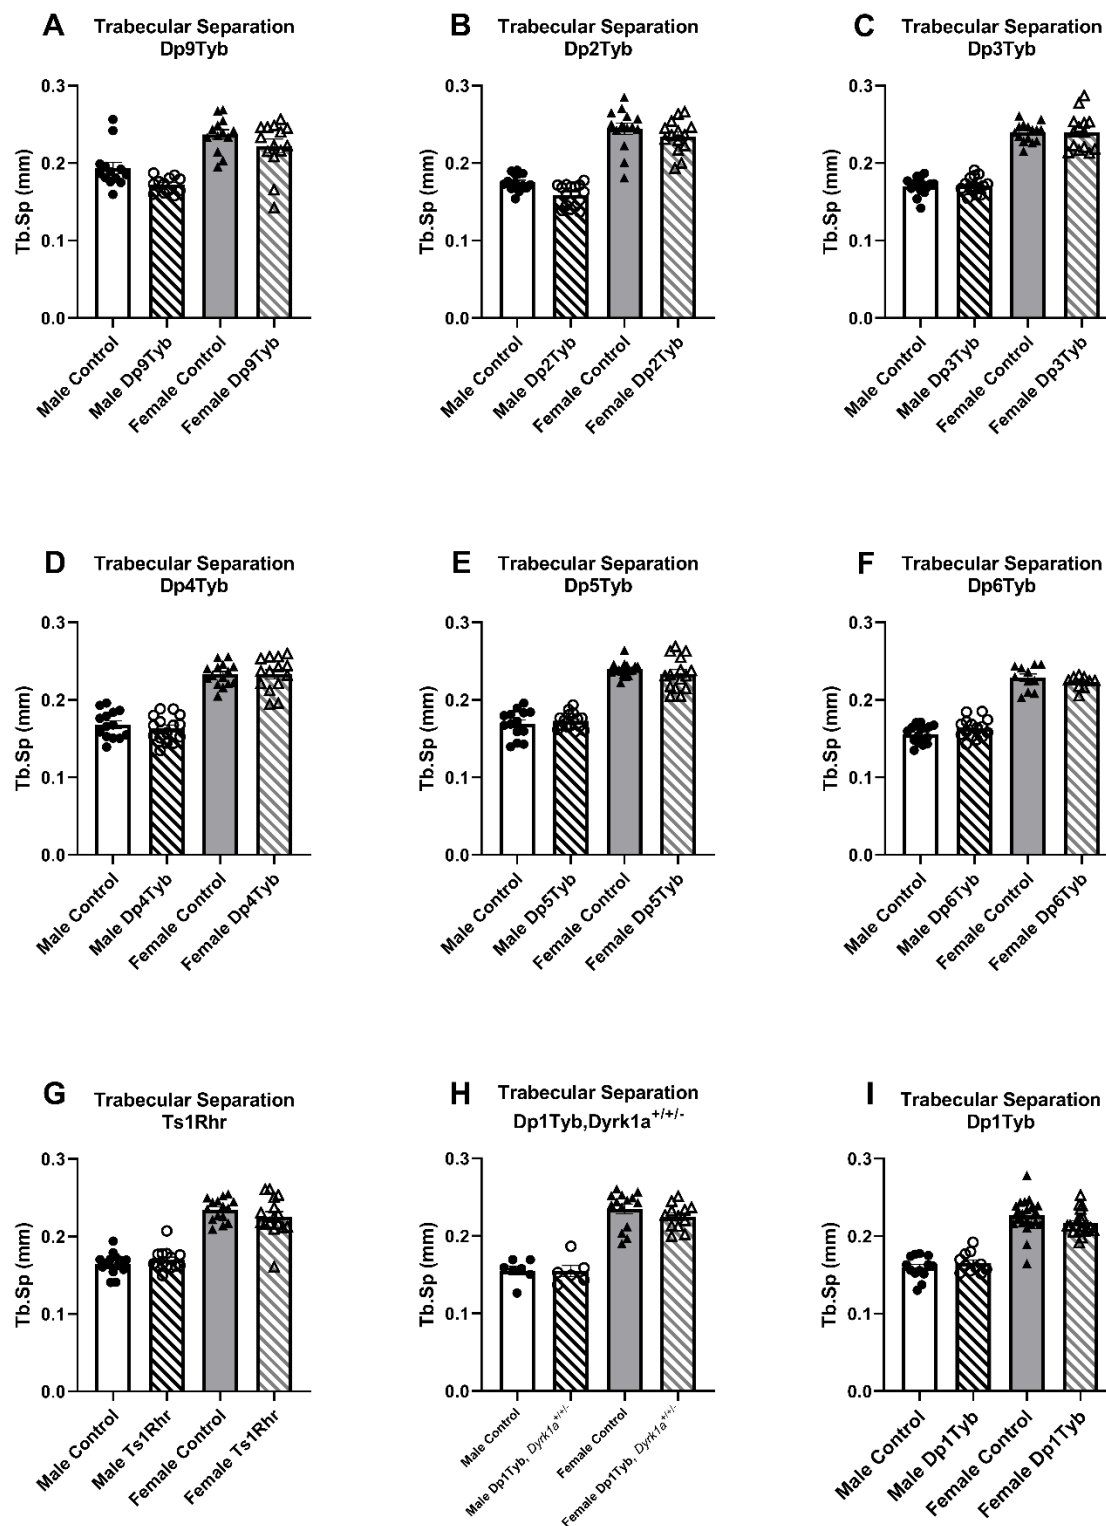

**Fig. S3. Trabecular separation measurements in triplicated (Dp) mouse models and control mice.** Animal numbers are as listed in Tables 1 and 2. Data are mean  $\pm$  SEM. Dp1Tyb data comes from Thomas et al. (2020).

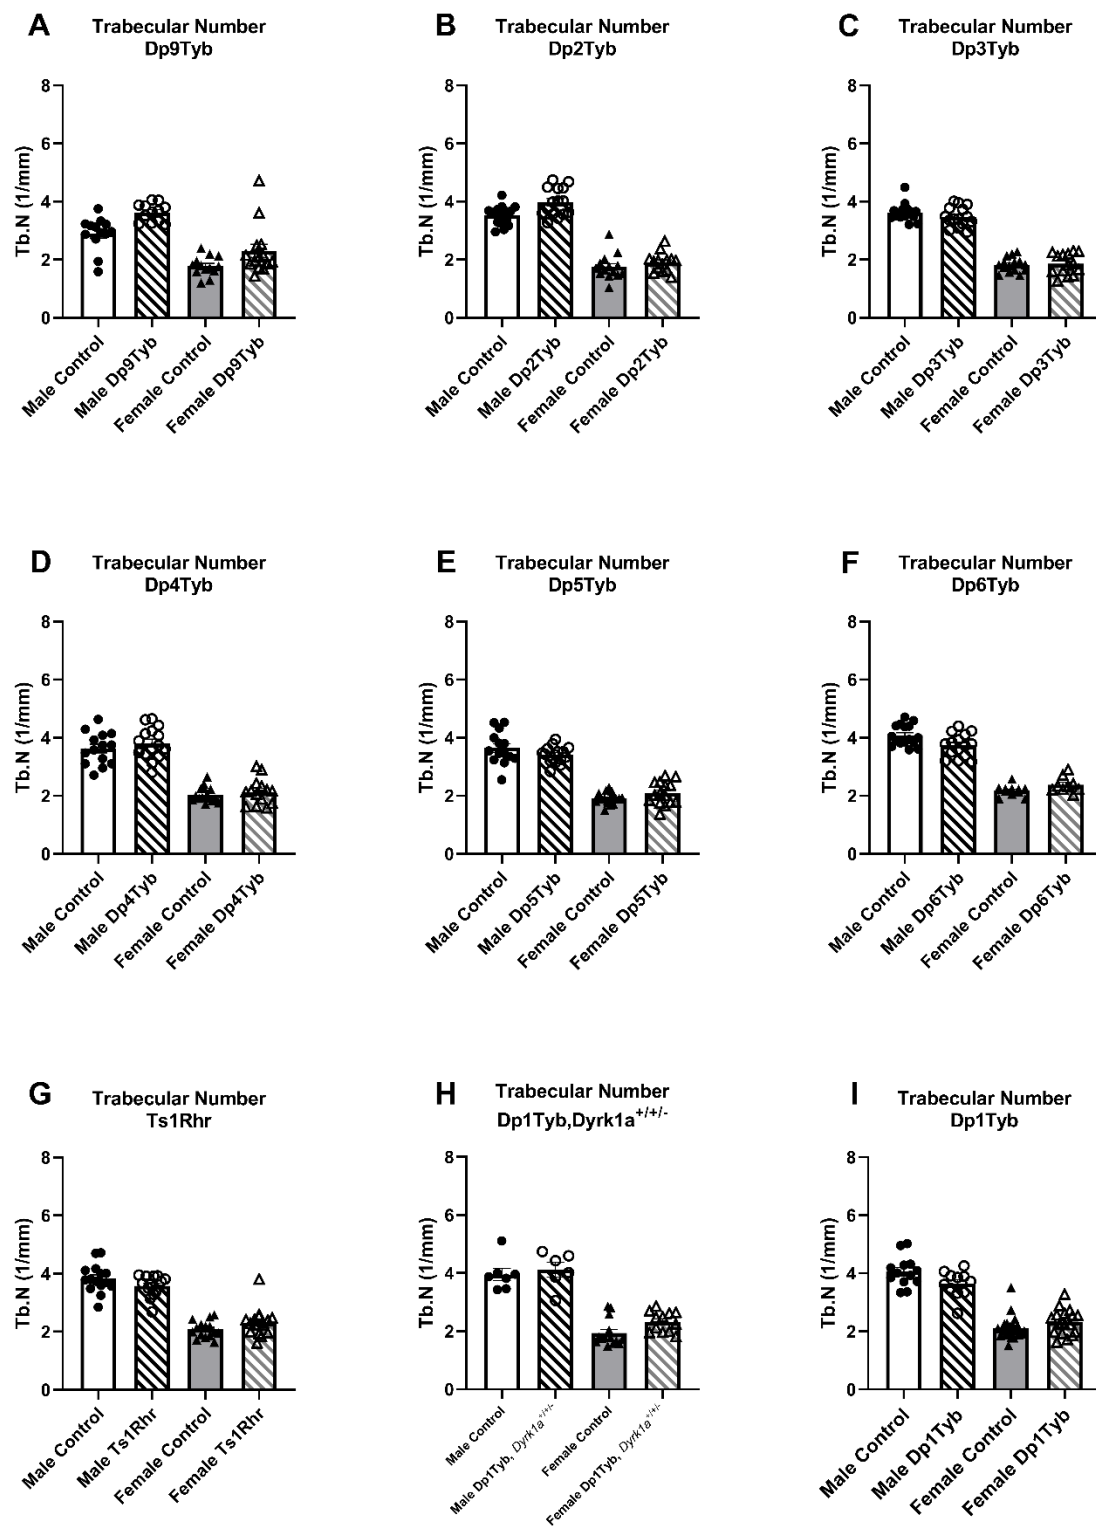

**Fig. S4. Trabecular number measurements in triplicated (Dp) mouse models and control mice.** Animal numbers are as listed in Tables 1 and 2. Data are mean  $\pm$  SEM. Dp1Tyb data from Thomas et al. (2020).

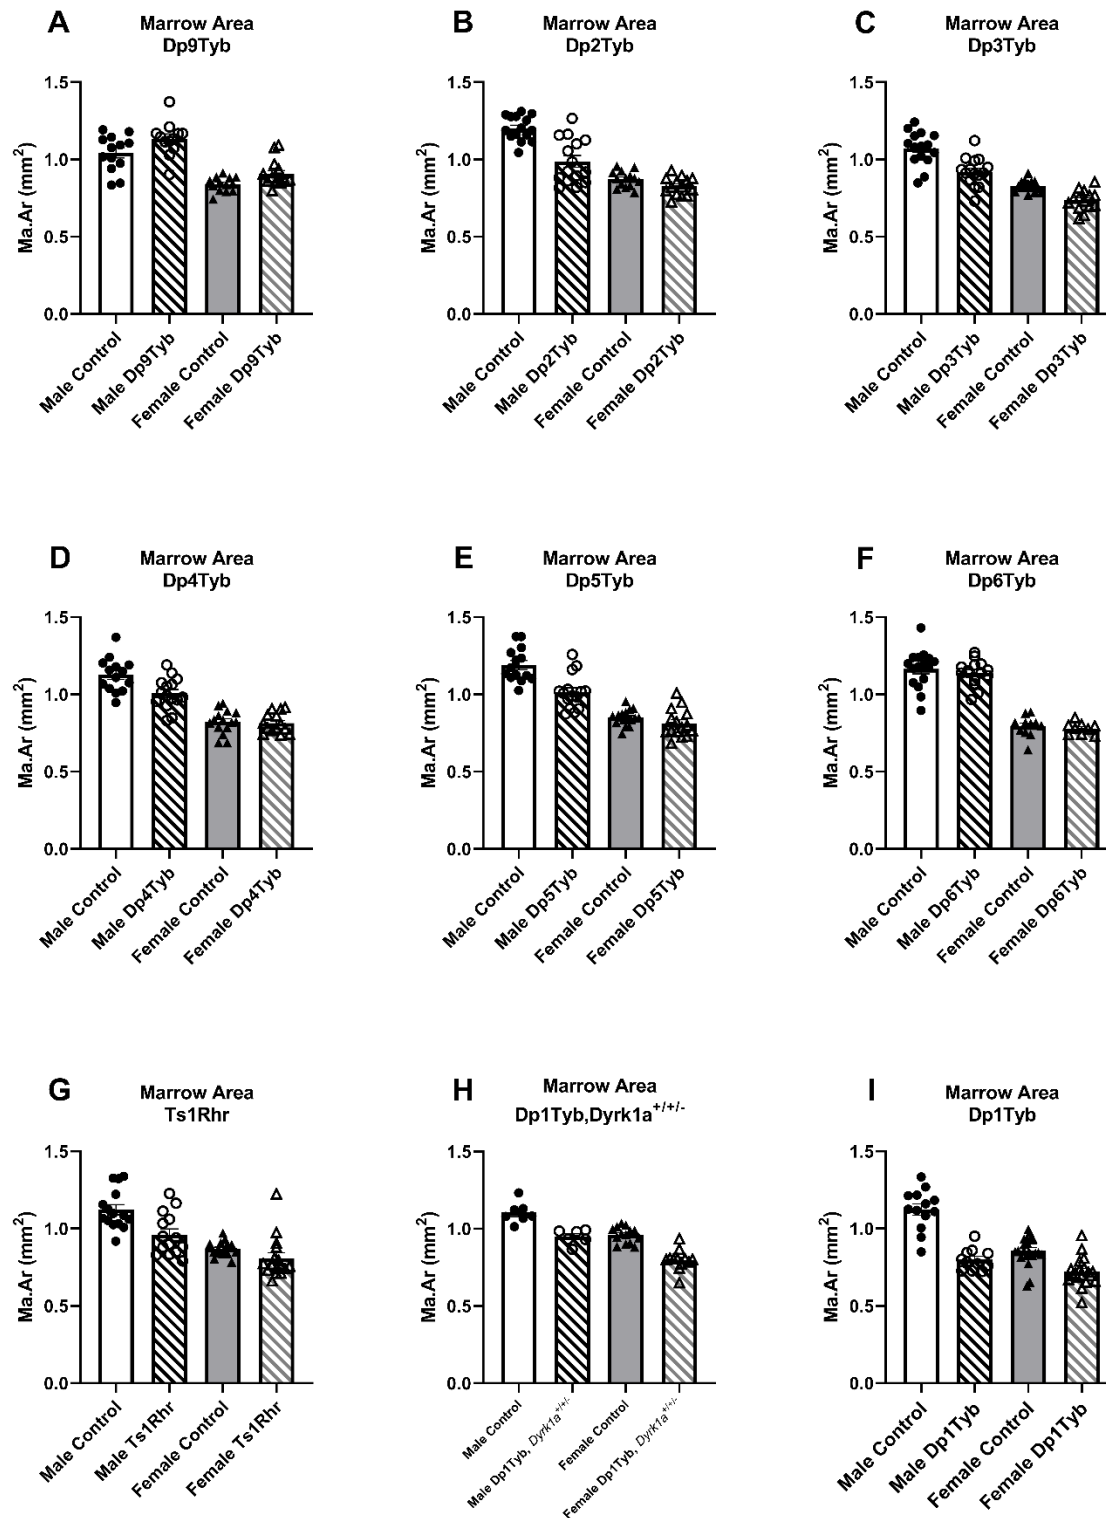

**Fig. S5. Marrow area measurements in triplicated (Dp) mouse models and control mice.** Animal numbers are as listed in Tables 1 and 2. Data are mean  $\pm$  SEM. Dp1Tyb data comes from Thomas et al. (2020).

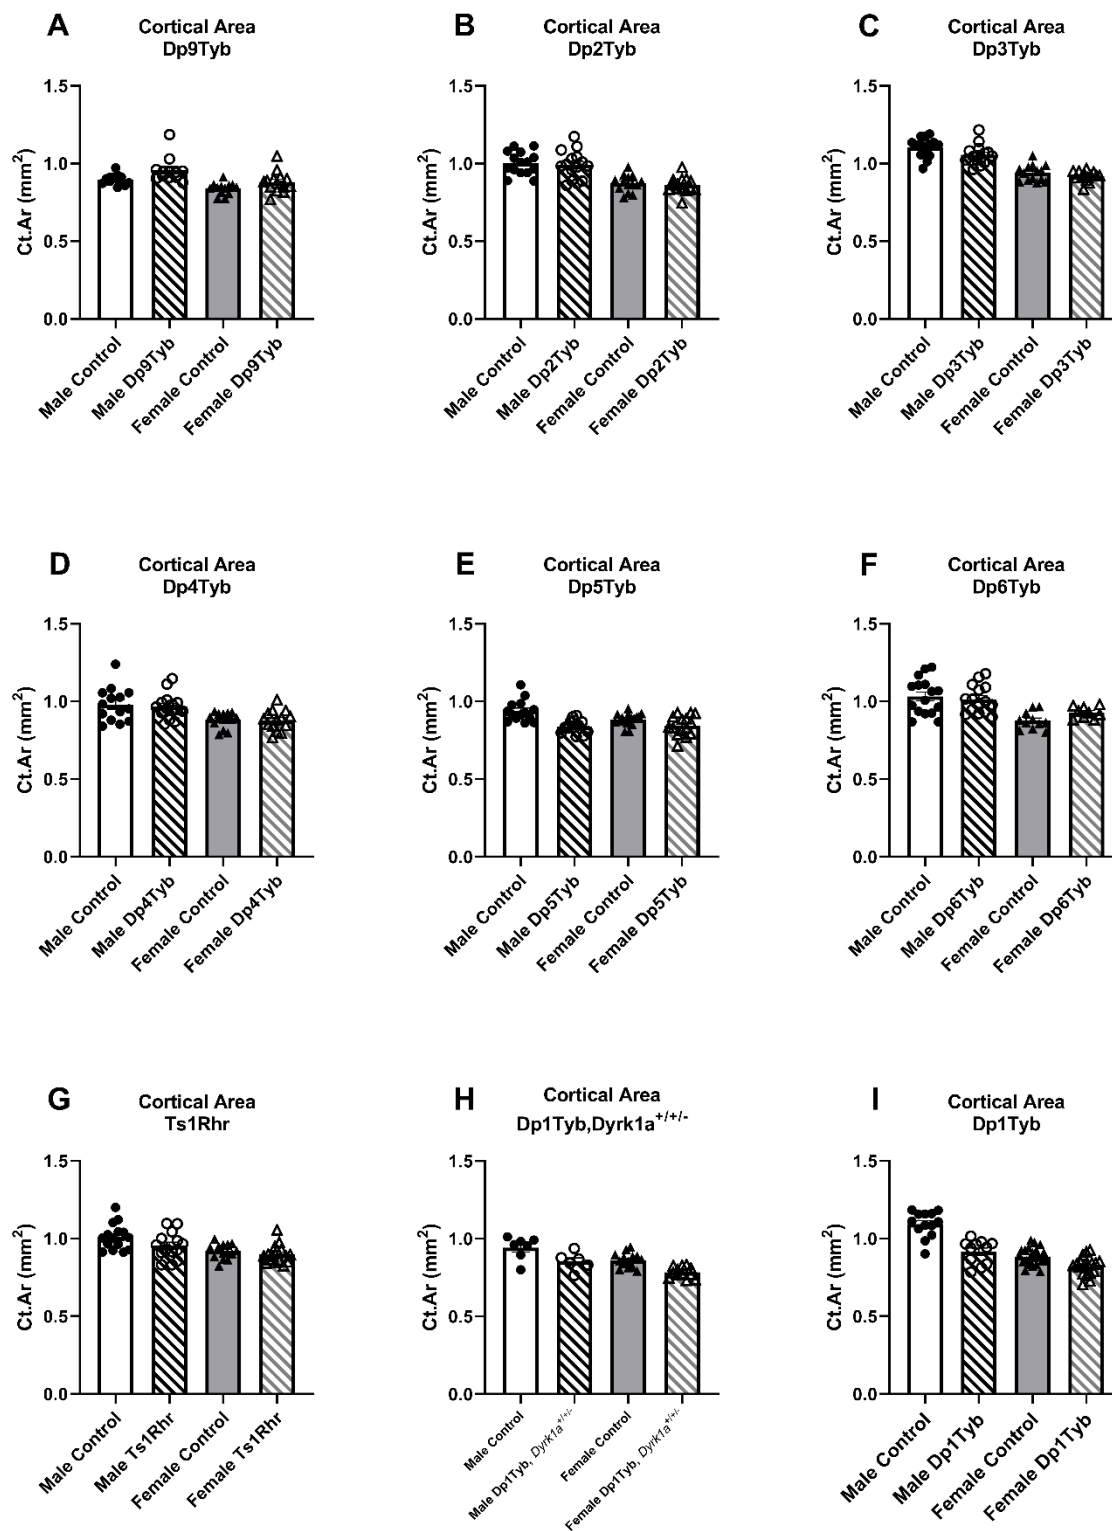

**Fig. S6. Cortical area measurements in triplicated (Dp) mouse models and control mice.** Animal numbers are as listed in Tables 1 and 2. Data are mean  $\pm$  SEM. Dp1Tyb data comes from Thomas et al. (2020).

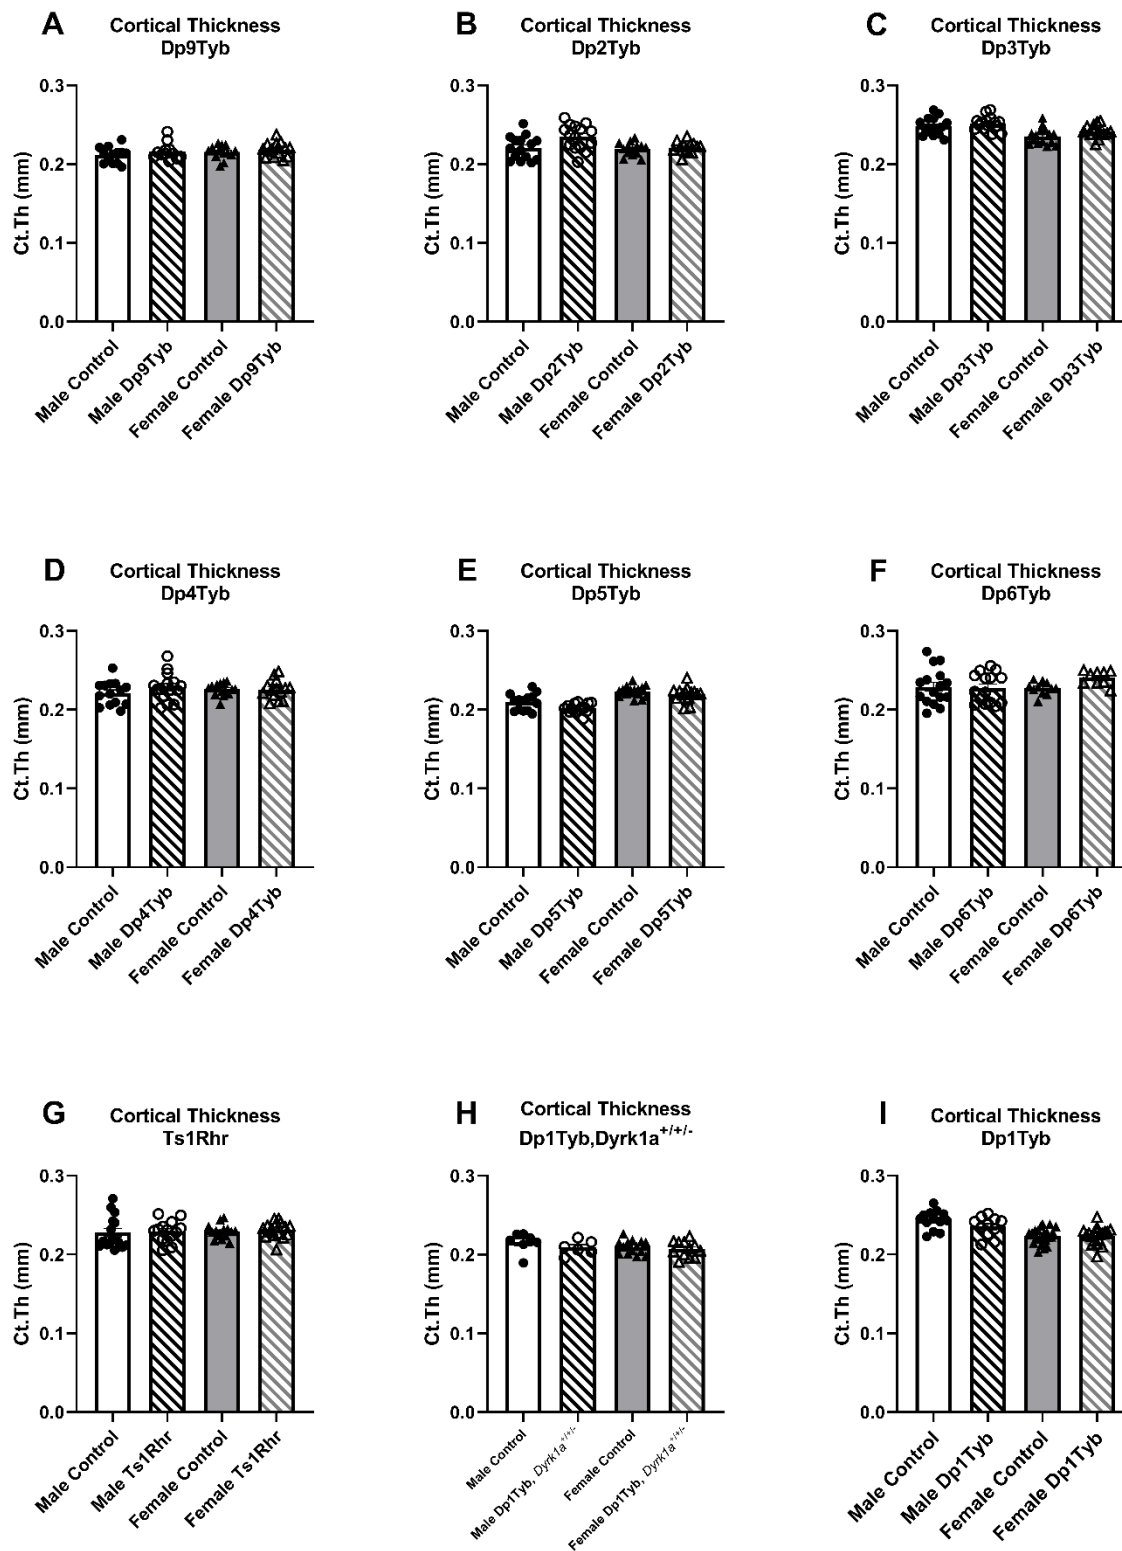

**Fig. S7. Cortical thickness measurements in triplicated (Dp) models and control mice.** Animal numbers in Tables 2. Data are mean  $\pm$  SEM. Dp1Tyb data from Thomas et al. (2020).



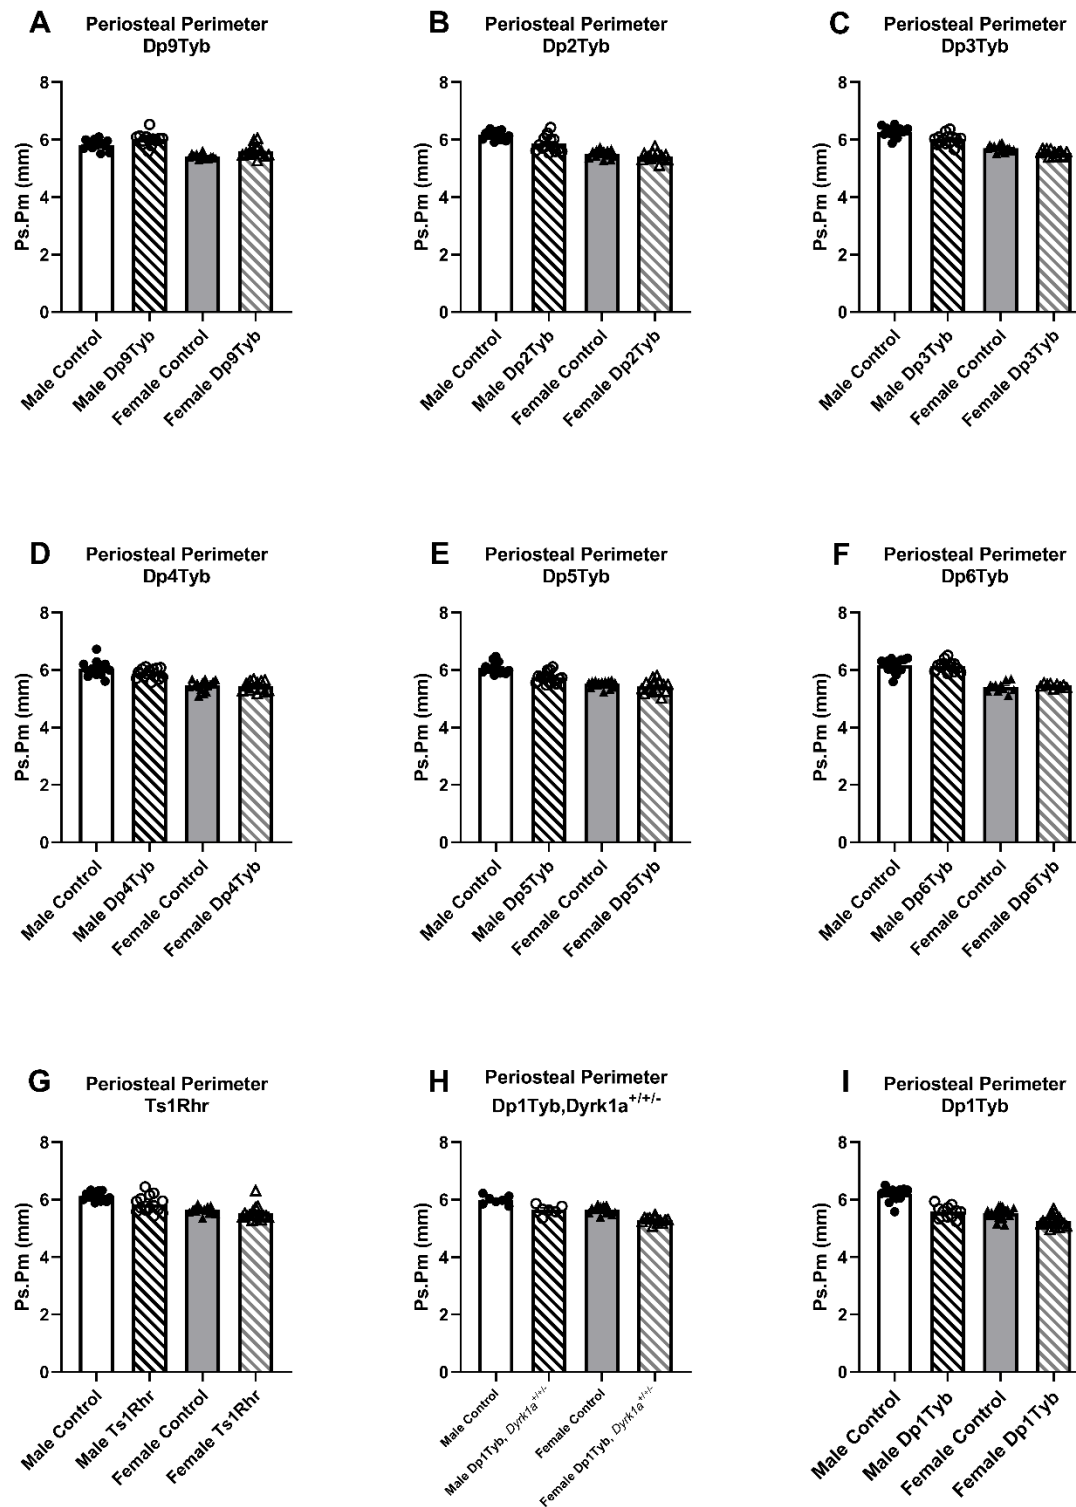

**Fig. S8. Periosteal perimeter measurements in triplicated (Dp) mouse models and control mice.** Animal numbers are as listed in Tables 1 and 2. Data are mean  $\pm$  SEM. Dp1Tyb data comes from Thomas et al. (2020).



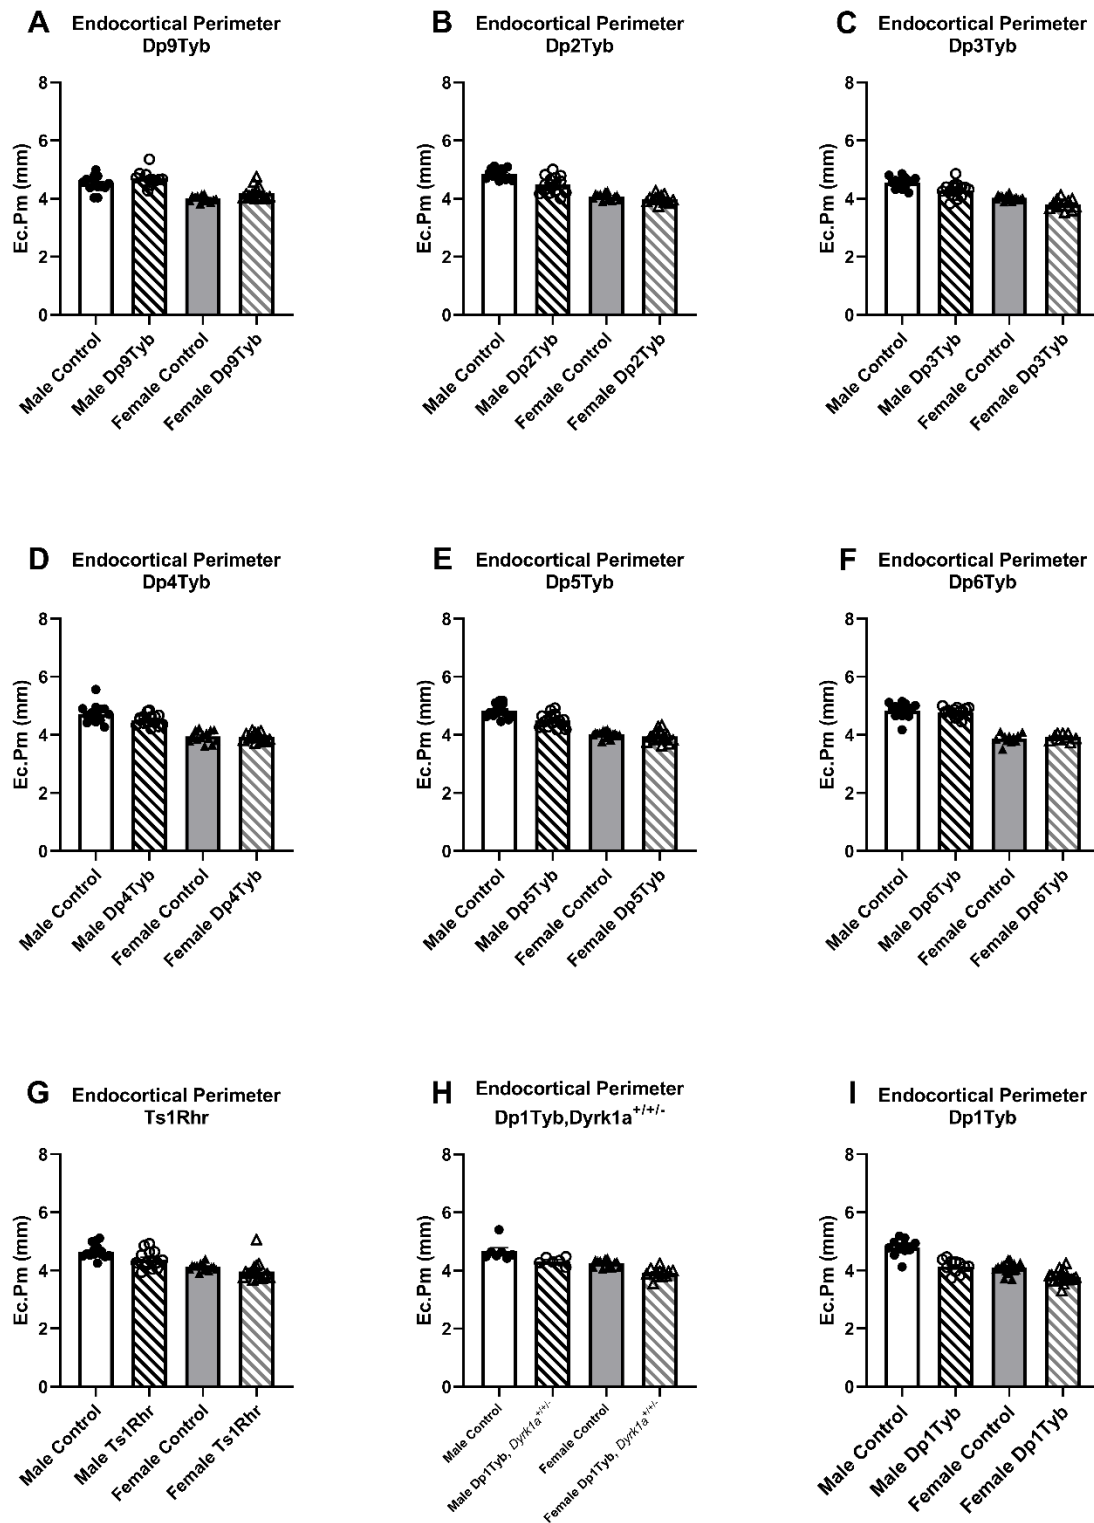

**Fig. S9. Endocortical perimeter measurements in triplicated (Dp) mouse models and control mice.** Animal numbers are as listed in Tables 1 and 2. Data are mean  $\pm$  SEM. Dp1Tyb data comes from Thomas et al. (2020).

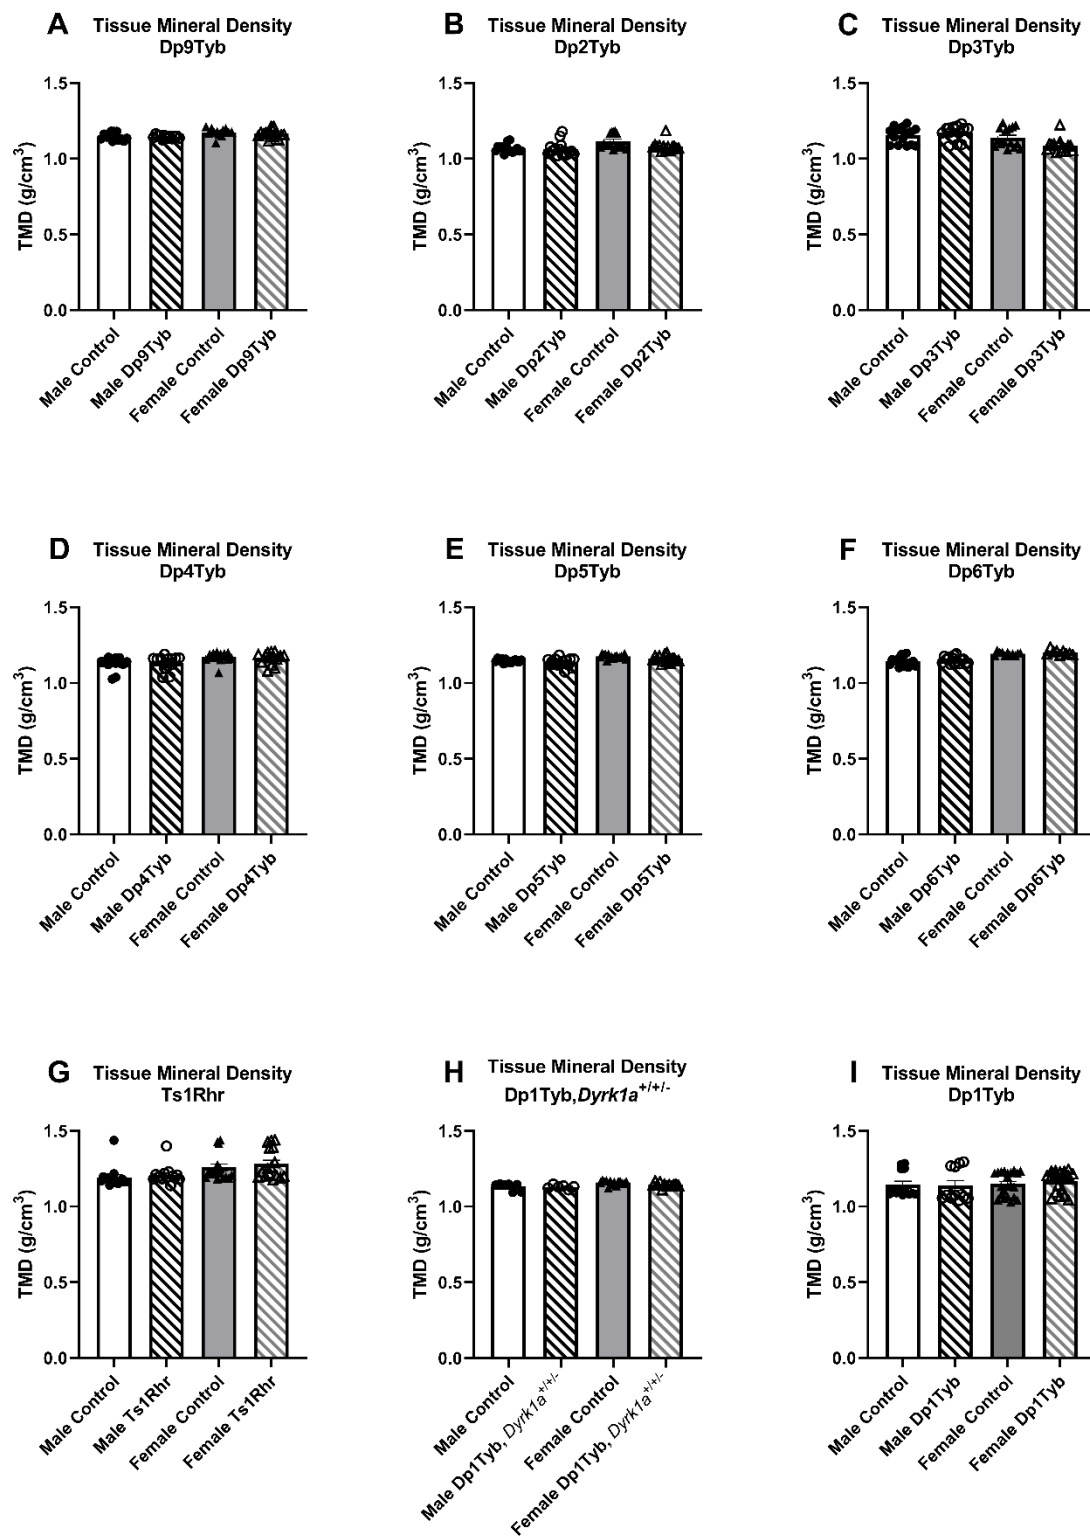

**Fig. S10. Tissue mineral density measurements in triplicated (Dp) mouse models and control mice.** Animal numbers are as listed in Tables 1 and 2. Data are mean  $\pm$  SEM. Dp1Tyb data comes from Thomas et al. (2020).

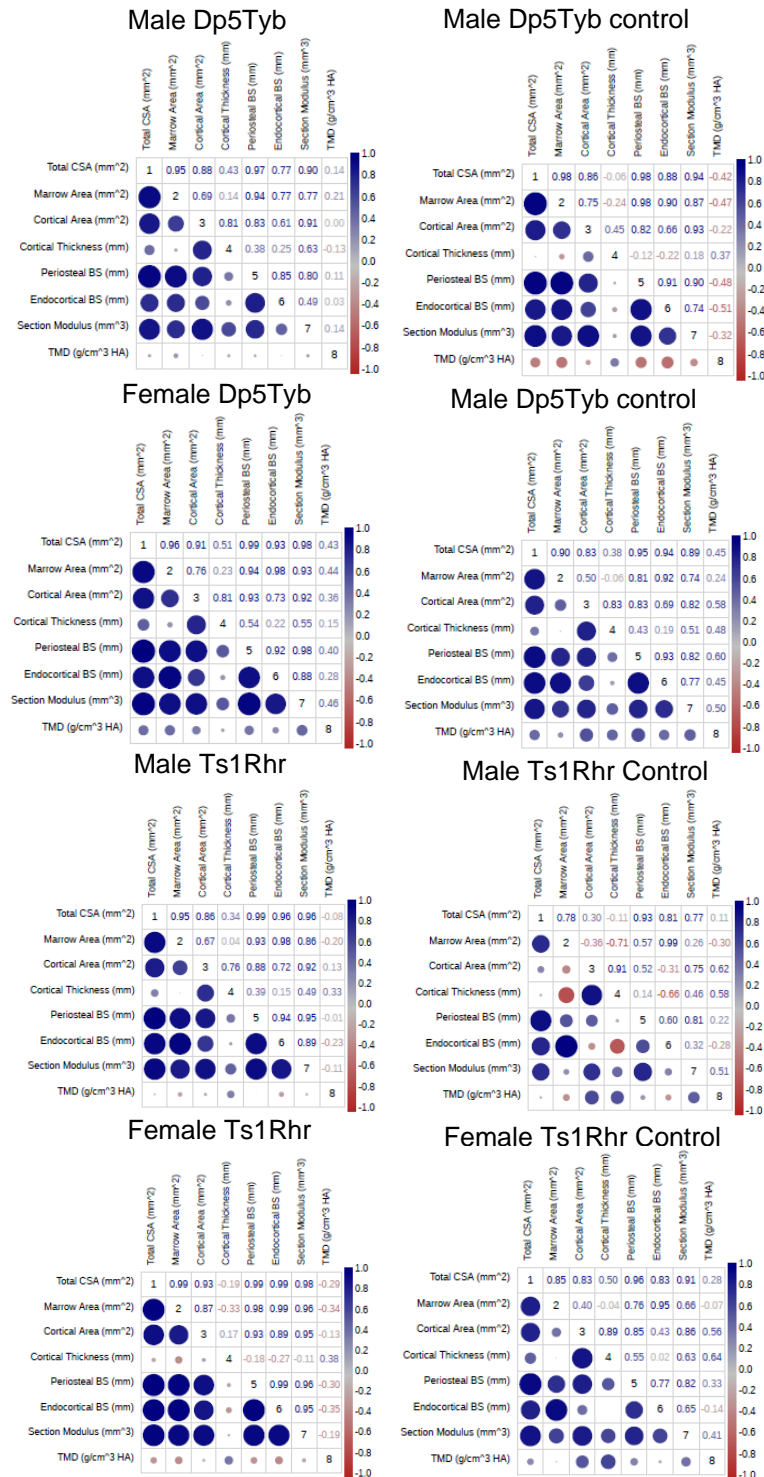

**Fig. S11. Correlation between bone parameters of Dp5Tyb and Ts1Rhr male and female mice.** Scale of correlation is at the right, with blue as a positive and red as a negative correlation. The larger the circle, the greater the correlation.

**Table S1. Results of Tukey's post hoc analysis (multiple comparisons) for two-way ANOVAs.**

This was only performed if there was a significant (adjusted p value < 0.05) interaction on the two-way ANOVA. <sup>a</sup> logarithmic transformation of data. <sup>b</sup> significant Levene's test (unequal variances) and subsequent analysis indicated no significant difference. M = male, F = female, WT = control/wildtype, Dp = triplicated Dp/Ts strain

| <b>Dp2Tyb</b>         |              |                     |              |                          |                        |                   |              |
|-----------------------|--------------|---------------------|--------------|--------------------------|------------------------|-------------------|--------------|
|                       | <i>Tt.Ar</i> | <i>Ma.Ar</i>        | <i>Ec.Pm</i> | <i>Yield Stress</i>      | <i>Ultimate Stress</i> | <i>Resilience</i> |              |
| M WT vs M Dp          | 0.0003       | <0.0001             | <0.0001      | 0.0006                   | 0.0016                 | 0.0158            |              |
| M WT vs F WT          | <0.0001      | <0.0001             | <0.0001      | <0.0001                  | 0.0010                 | <0.0001           |              |
| M WT vs F Dp          | <0.0001      | <0.0001             | <0.0001      | <0.0001                  | 0.0002                 | <0.0001           |              |
| M Dp vs F WT          | 0.0002       | 0.0073              | <0.0001      | 0.0185                   | 0.9673                 | 0.0728            |              |
| M Dp vs F Dp          | <0.0001      | 0.0001              | <0.0001      | 0.0010                   | 0.8413                 | 0.0804            |              |
| F WT vs F Dp          | 0.6889       | 0.5669              | 0.6048       | 0.8560                   | 0.9886                 | 0.9988            |              |
| <b>Dp3Tyb<br/>TMD</b> |              |                     |              |                          |                        |                   |              |
| M WT vs M Dp          | 0.7818       |                     |              |                          |                        |                   |              |
| M WT vs F WT          | 0.8954       |                     |              |                          |                        |                   |              |
| M WT vs F Dp          | 0.0093       |                     |              |                          |                        |                   |              |
| M Dp vs F WT          | 0.3618       |                     |              |                          |                        |                   |              |
| M Dp vs F Dp          | 0.0005       |                     |              |                          |                        |                   |              |
| F WT vs F Dp          | 0.0565       |                     |              |                          |                        |                   |              |
| <b>Dp5Tyb</b>         |              |                     |              |                          |                        |                   |              |
|                       | <i>BMD</i>   | <i>BV/TV</i>        | <i>Tt.Ar</i> | <i>Ma.Ar<sup>a</sup></i> | <i>Ct.Ar</i>           | <i>Ps.Pm</i>      | <i>Ec.Pm</i> |
| M WT vs M Dp          | 0.0137       | 0.0283 <sup>b</sup> | <0.0001      | <0.0001                  | <0.0001                | <0.0001           | 0.0002       |
| M WT vs F WT          | <0.0001      | <0.0001             | <0.0001      | <0.0001                  | 0.0346                 | <0.0001           | <0.0001      |
| M WT vs F Dp          | <0.0001      | <0.0001             | <0.0001      | <0.0001                  | 0.0002                 | <0.0001           | <0.0001      |
| M Dp vs F WT          | <0.0001      | <0.0001             | 0.0654       | <0.0001                  | 0.1077                 | 0.0039            | <0.0001      |
| M Dp vs F Dp          | <0.0001      | <0.0001             | 0.0011       | <0.0001                  | 0.9847                 | <0.0001           | <0.0001      |
| F WT vs F Dp          | 0.5883       | 0.8185              | 0.4037       | 0.4407                   | 0.2208                 | 0.4387            | 0.6417       |
| <b>Dp6Tyb</b>         |              |                     |              |                          |                        |                   |              |
|                       | <i>BMD</i>   | <i>BV/TV</i>        | <i>Tb.Th</i> | <i>Tb.N</i>              | <i>Modulus</i>         |                   |              |
| M WT vs M Dp          | 0.0685       | 0.0684              | 0.9995       | 0.029 <sup>b</sup>       | 0.9836                 |                   |              |
| M WT vs F WT          | <0.0001      | <0.0001             | <0.0001      | <0.0001                  | 0.0292                 |                   |              |
| M WT vs F Dp          | <0.0001      | <0.0001             | 0.4481       | <0.0001                  | <0.0001                |                   |              |
| M Dp vs F WT          | <0.0001      | <0.0001             | <0.0001      | <0.0001                  | 0.0684                 |                   |              |
| M Dp vs F Dp          | <0.0001      | <0.0001             | 0.5147       | <0.0001                  | <0.0001                |                   |              |
| F WT vs F Dp          | 0.4520       | 0.2257              | 0.0215       | 0.5337                   | 0.002                  |                   |              |

**Table S2. Percent differences in trabecular skeletal values of male and female triplicated and control littermate mice.** Percent change ( $[(\text{mean of Dp} - \text{mean of Control}) / \text{mean of Control}] * 100$ ) reported in tables. **Red** indicates significant deficit; **blue** indicates significant improvement compared to same-sex control littermates (adjusted  $p < 0.05$  via two-tail t test). Adjusted p values reported in Table S4.

| MALE         |         |                                         |         |        |        |        |        |         |        |
|--------------|---------|-----------------------------------------|---------|--------|--------|--------|--------|---------|--------|
|              | Dp1Tyb  | Dp1Tyb,<br><i>Dyrk1a</i> <sup>+/-</sup> | Dp9Tyb  | Dp2Tyb | Dp3Tyb | Ts1Rhr | Dp4Tyb | Dp5Tyb  | Dp6Tyb |
| <i>BMD</i>   | -15.78% | -0.11%                                  | 17.03%  | 6.85%  | -0.82% | -5.27% | 1.21%  | -10.35% | -8.03% |
| <i>BV/TV</i> | -15.83% | 1.30%                                   | 29.48%  | 13.17% | -3.29% | -7.82% | 2.71%  | -11.63% | -8.72% |
| <i>Tb.Th</i> | -6.71%  | -2.60%                                  | 3.64%   | 0.52%  | 0.88%  | -1.21% | -2.33% | -5.68%  | -0.19% |
| <i>Tb.Sp</i> | 3.76%   | -0.46%                                  | -11.25% | -9.35% | 0.67%  | 2.94%  | -2.87% | 2.27%   | 4.96%  |
| <i>Tb.N</i>  | -10.29% | 4.16%                                   | 25.04%  | 12.88% | -4.12% | -6.64% | 5.14%  | -6.36%  | -8.35% |

  

| FEMALE       |        |                                         |        |        |         |         |        |        |        |
|--------------|--------|-----------------------------------------|--------|--------|---------|---------|--------|--------|--------|
|              | Dp1Tyb | Dp1Tyb,<br><i>Dyrk1a</i> <sup>+/-</sup> | Dp9Tyb | Dp2Tyb | Dp3Tyb  | Ts1Rhr  | Dp4Tyb | Dp5Tyb | Dp6Tyb |
| <i>BMD</i>   | 10.84% | 10.55%                                  | 19.26% | -1.31% | 4.99%   | -21.00% | 2.17%  | 6.59%  | 10.09% |
| <i>BV/TV</i> | 11.12% | 22.32%                                  | 37.26% | 6.27%  | 2.84%   | 11.34%  | 6.35%  | 6.60%  | 17.36% |
| <i>Tb.Th</i> | 0.73%  | 1.57%                                   | 5.61%  | -1.22% | 1.02%   | -0.13%  | 2.49%  | -2.57% | 7.41%  |
| <i>Tb.Sp</i> | -4.37% | -4.14%                                  | -6.29% | -4.00% | -0.004% | -3.80%  | 0.09%  | -2.46% | -2.50% |
| <i>Tb.N</i>  | 9.97%  | 20.15%                                  | 29.24% | 8.78%  | 2.01%   | 11.48%  | 4.33%  | 9.32%  | 9.19%  |

**Table S3. Percent differences in cortical skeletal values of male and female triplicated and control littermate mice.** Percent change ( $[(\text{mean of Dp} - \text{mean of Control}) / \text{mean of Control}] * 100$ ) reported in tables. **Red** indicates significant deficit; **blue** indicates significant improvement compared to same-sex control littermates (adjusted  $p < 0.05$  via two-tail t test). Adjusted p values reported in Table S4.

| MALE         |         |                                         |        |         |         |         |         |         |        |
|--------------|---------|-----------------------------------------|--------|---------|---------|---------|---------|---------|--------|
|              | Dp1Tyb  | Dp1Tyb,<br><i>Dyrk1a</i> <sup>+/-</sup> | Dp9Tyb | Dp2Tyb  | Dp3Tyb  | Ts1Rhr  | Dp4Tyb  | Dp5Tyb  | Dp6Tyb |
| <i>Tt.Ar</i> | -22.64% | -11.99%                                 | 7.81%  | -10.19% | -9.12%  | -10.22% | -6.23%  | -12.88% | -1.95% |
| <i>Ma.Ar</i> | -28.91% | -14.16%                                 | 8.80%  | -17.78% | -14.11% | -14.39% | -10.57% | -14.72% | -2.26% |
| <i>Ct.Ar</i> | -16.18% | -9.44%                                  | 6.65%  | -1.08%  | -4.28%  | -5.59%  | -1.24%  | -10.55% | -1.61% |
| <i>Ct.Th</i> | -3.48%  | -3.14%                                  | 2.12%  | 6.32%   | 1.60%   | 0.65%   | 3.39%   | -3.72%  | -0.59% |
| <i>Ps.Pm</i> | -9.89%  | -5.71%                                  | 3.50%  | -4.87%  | -4.13%  | -4.54%  | -2.60%  | -5.36%  | -0.44% |
| <i>Ec.Pm</i> | -13.55% | -7.34%                                  | 4.17%  | -7.85%  | -5.68%  | -5.88%  | -4.33%  | -6.91%  | -1.35% |
| FEMALE       |         |                                         |        |         |         |         |         |         |        |
|              | Dp1Tyb  | Dp1Tyb,<br><i>Dyrk1a</i> <sup>+/-</sup> | Dp9Tyb | Dp2Tyb  | Dp3Tyb  | Ts1Rhr  | Dp4Tyb  | Dp5Tyb  | Dp6Tyb |
| <i>Tt.Ar</i> | -11.54% | -13.12%                                 | 6.44%  | -3.32%  | -6.49%  | -4.49%  | -0.67%  | -4.32%  | 2.29%  |
| <i>Ma.Ar</i> | -16.09% | -16.78%                                 | 7.82%  | -5.22%  | -11.19% | -6.88%  | -0.84%  | -4.41%  | -1.77% |
| <i>Ct.Ar</i> | -7.13%  | -9.04%                                  | 5.07%  | -1.42%  | -2.34%  | -2.23%  | -0.52%  | -4.23%  | 5.96%  |
| <i>Ct.Th</i> | -0.01%  | -1.31%                                  | 1.39%  | 0.79%   | 2.51%   | 1.00%   | -0.12%  | -1.82%  | 5.89%  |
| <i>Ps.Pm</i> | -4.94%  | -6.26%                                  | 3.06%  | -1.68%  | -2.87%  | -2.11%  | -0.36%  | -1.75%  | 0.89%  |
| <i>Ec.Pm</i> | -7.77%  | -8.13%                                  | 4.66%  | -2.23%  | -5.39%  | -3.88%  | -0.38%  | -2.06%  | 0.98%  |

**Table S4. Results (adjusted p values) of two-tail t tests for trabecular and cortical parameters.** Significance was declared with an adjusted p value < 0.05). M = male, F = female, WT = control/wildtype, Dp = triplicated Dp/Ts strain

|              |               | Dp1Tyb | Dp1Tyb,<br><i>Dyrk1a</i> <sup>+/-</sup> | Dp9Tyb | Dp2Tyb | Dp3Tyb | Ts1Rhr | Dp4Tyb | Dp5Tyb | Dp6Tyb |
|--------------|---------------|--------|-----------------------------------------|--------|--------|--------|--------|--------|--------|--------|
| <b>BMD</b>   | M WT vs M Dp  | 0.014  | 0.986                                   | 0.003  | 0.249  | 1.000  | 0.562  | 0.836  | 0.024  | 0.089  |
|              | F WT vs F Dp  | 0.444  | 0.135                                   | 0.063  | 0.822  | 1.000  | 0.330  | 0.851  | 0.394  | 0.188  |
| <b>BV/TV</b> | M WT vs M Dp  | 0.015  | 1.000                                   | 0.002  | 0.073  | 1.000  | 0.609  | 0.837  | 0.034  | 0.054  |
|              | F WT vs F Dp  | 0.178  | 0.077                                   | 0.059  | 0.834  | 1.000  | 0.391  | 0.973  | 0.371  | 0.050  |
| <b>Tb.Th</b> | M WT vs M Dp  | 0.014  | 1.000                                   | 0.068  | 0.861  | 1.000  | 0.478  | 1.000  | 0.019  | 0.920  |
|              | F WT vs F Dp  | 0.689  | 0.471                                   | 0.097  | 0.791  | 1.000  | 0.937  | 1.000  | 0.368  | 0.113  |
| <b>Tb.Sp</b> | M WT vs. M Dp | 0.304  | 1.000                                   | 0.018  | 0.007  | 0.974  | 0.578  | 0.764  | 0.482  | 0.100  |
|              | F WT vs F Dp  | 0.189  | 0.299                                   | 0.180  | 0.748  | 0.999  | 0.295  | 0.976  | 0.301  | 0.341  |
| <b>Tb.N</b>  | M WT vs M Dp  | 0.059  | 1.000                                   | 0.004  | 0.015  | 0.829  | 0.316  | 1.000  | 0.211  | 0.045  |
|              | F WT vs F Dp  | 0.272  | 0.129                                   | 0.068  | 1.000  | 0.938  | 0.538  | 0.854  | 0.556  | 0.113  |
| <b>Tt.Ar</b> | M WT vs M Dp  | <0.001 | 0.007                                   | 0.068  | 0.001  | 0.002  | 0.009  | 0.105  | <0.001 | 1.000  |
|              | F WT vs F Dp  | <0.001 | <0.001                                  | 0.043  | 0.226  | <0.001 | 0.191  | 1.000  | 0.217  | 0.746  |
| <b>Ma.Ar</b> | M WT vs M Dp  | <0.001 | 0.004                                   | 0.085  | <0.001 | 0.002  | 0.008  | 0.030  | <0.001 | 0.986  |
|              | F WT vs F Dp  | <0.001 | <0.001                                  | 0.035  | 0.236  | <0.001 | 0.239  | 1.000  | 0.178  | 0.588  |
| <b>Ct.Ar</b> | M WT vs M Dp  | <0.001 | 0.052                                   | 0.046  | 0.723  | 0.058  | 0.101  | 0.734  | <0.001 | 0.986  |
|              | F WT vs F Dp  | 0.001  | <0.001                                  | 0.068  | 0.651  | 0.178  | 0.351  | 0.997  | 0.305  | 0.082  |
| <b>Ct.Th</b> | M WT vs M Dp  | 0.108  | 0.297                                   | 0.288  | 0.024  | 0.284  | 0.822  | 0.277  | 0.019  | 0.860  |
|              | F WT vs F Dp  | 0.997  | 0.466                                   | 0.393  | 0.556  | 0.122  | 0.510  | 0.943  | 0.165  | 0.0158 |
| <b>Ps.Pm</b> | M WT vs M Dp  | <0.001 | 0.007                                   | 0.101  | 0.001  | 0.001  | 0.006  | 0.107  | <0.001 | 0.860  |
|              | F WT vs F Dp  | <0.001 | <0.001                                  | 0.080  | 0.231  | <0.001 | 0.343  | 1.000  | 0.242  | 0.667  |
| <b>Ec.Pm</b> | M WT vs M Dp  | <0.001 | 0.048                                   | 0.113  | <0.001 | 0.004  | 0.016  | 0.131  | <0.001 | 1.000  |
|              | F WT vs F Dp  | <0.001 | <0.001                                  | 0.043  | 0.211  | <0.001 | 0.567  | 1.000  | 0.221  | 0.698  |



**Table S5. qPCR probes utilized by Transnetyx (Cordova, TN, USA) for genotyping**

|                                         | Probe 1      |                                    |                                     |                                                       | Probe 2 |                                             |                                 |                                                     | Probe 3         |                                    |                                  |                                      | Probe 4         |                                      |                                 |                                            |
|-----------------------------------------|--------------|------------------------------------|-------------------------------------|-------------------------------------------------------|---------|---------------------------------------------|---------------------------------|-----------------------------------------------------|-----------------|------------------------------------|----------------------------------|--------------------------------------|-----------------|--------------------------------------|---------------------------------|--------------------------------------------|
|                                         | Name         | Forward Primer                     | Reporter                            | Reverse Primer                                        | Name    | Forward Primer                              | Reporter                        | Reverse Primer                                      | Name            | Forward Primer                     | Reporter                         | Reverse Primer                       | Name            | Forward Primer                       | Reporter                        | Reverse Primer                             |
| <b>Dp1Tyb</b>                           | 3'i17        | CGGGCC<br>TCTTCG<br>CTATTA<br>CG   | CTGCAA<br>ACTCTA<br>AAAGAT<br>CCGGC | CTCTCT<br>CCCTGA<br>GTGCAT<br>TCTC                    | 5'i16   | CCCTAA<br>GTCCTT<br>GTCCTT<br>CACA          | CAGTGC<br>AGATCC<br>GGCGCG      | GCAGTT<br>GTTTAA<br>ACTTCT<br>AGAGAA<br>TGAGTT<br>C |                 |                                    |                                  |                                      |                 |                                      |                                 |                                            |
| <b>Dp9Tyb</b>                           | 3'i17        | CGGGCC<br>TCTTCG<br>CTATTA<br>CG   | CTGCAA<br>ACTCTA<br>AAAGAT<br>CCGGC | CTCTCT<br>CCCTGA<br>GTGCAT<br>TCTC                    | 5'h04   | CTTCTC<br>TGGACC<br>AAAGGG<br>TTCTTG<br>ACA | CTAGTG<br>GATCTC<br>GAGCC       | CTATGG<br>CTTCTG<br>AGGCGG<br>AAAGAA<br>CCA         |                 |                                    |                                  |                                      |                 |                                      |                                 |                                            |
| <b>Dp2Tyb</b>                           | 3'h04        | CGGTGC<br>GGGCCT<br>CTT            | ATTACG<br>CCAGGG<br>CGCG            | CCCCAC<br>CCAATG<br>TCCAAA<br>GAC                     | 5'i02   | GCCTTG<br>ACTGAG<br>GACGTT<br>GA            | CGCGCC<br>GGATCG<br>AT          | GCAGTT<br>GTTTAA<br>ACTTCT<br>AGAGAA<br>TGAGTT<br>C |                 |                                    |                                  |                                      |                 |                                      |                                 |                                            |
| <b>Dp3Tyb</b>                           | 3'i02        | CGTTGG<br>CCGATT<br>CATTAA<br>TGCA | CTTAAC<br>CACACC<br>CTTACT<br>CG    | GACACA<br>CCACAT<br>CACTGA<br>AACAG                   | 5'i16   | CCCTAA<br>GTCCTT<br>GTCCTT<br>CACA          | CAGTGC<br>AGATCC<br>GGCGCG      | GCAGTT<br>GTTTAA<br>ACTTCT<br>AGAGAA<br>TGAGTT<br>C |                 |                                    |                                  |                                      |                 |                                      |                                 |                                            |
| <b>Dp4Tyb</b>                           | 3'i02        | CGTTGG<br>CCGATT<br>CATTAA<br>TGCA | CTTAAC<br>CACACC<br>CTTACT<br>CG    | GACACA<br>CCACAT<br>CACTGA<br>AACAG                   | 5'c09   | GCGTTA<br>CACACA<br>GAGCAT<br>GAAC          | CCGGAT<br>CACACT<br>CATGTC<br>G | GGCTTC<br>TGAGGC<br>GGAAAG<br>A                     |                 |                                    |                                  |                                      |                 |                                      |                                 |                                            |
| <b>Dp5Tyb</b>                           | 3'c09        | CGGGCC<br>TCTTCG<br>CTATTA<br>CG   | CACAGC<br>TTTGAT<br>CCGGCG<br>CG    | AGCCAG<br>GCGGTG<br>CTG                               | 5'b18   | CGAACA<br>ACTCAA<br>GGGAGG<br>AAAGAT<br>C   | CGCGCC<br>AAGCTT<br>TA          | AGAGCA<br>GAATAG<br>CAGTTG<br>TTTAAA<br>CTTCT       |                 |                                    |                                  |                                      |                 |                                      |                                 |                                            |
| <b>Dp6Tyb</b>                           | 3'b18        | CGTTGG<br>CCGATT<br>CATTAA<br>TGCA | ATTTGA<br>GCTTTG<br>ATCCGG<br>CGCG  | CCTTCC<br>TTCATA<br>ACTGAG<br>TGTCGT<br>A             | 5'i16   | CCCTAA<br>GTCCTT<br>GTCCTT<br>CACA          | CAGTGC<br>AGATCC<br>GGCGCG      | GCAGTT<br>GTTTAA<br>ACTTCT<br>AGAGAA<br>TGAGTT<br>C |                 |                                    |                                  |                                      |                 |                                      |                                 |                                            |
| <b>Ts1Rhr</b>                           | Ts1Rhr<br>Tg | CCTGAA<br>GTCCCG<br>GATGCC<br>A    | CACACC<br>ATATCT<br>GCATCA          | CATCAA<br>TGTATC<br>TTATCA<br>TGTCTT<br>TTCCGG<br>GCT |         |                                             |                                 |                                                     |                 |                                    |                                  |                                      |                 |                                      |                                 |                                            |
| <b>Dp1Tyb,<br/>Dyrk1a<sup>+/+</sup></b> | 3'i17        | CGGGCC<br>TCTTCG<br>CTATTA<br>CG   | CTGCAA<br>ACTCTA<br>AAAGAT<br>CCGGC | CTCTCT<br>CCCTGA<br>GTGCAT<br>TCTC                    | 5'i16   | CCCTAA<br>GTCCTT<br>GTCCTT<br>CACA          | CAGTGC<br>AGATCC<br>GGCGCG      | GCAGTT<br>GTTTAA<br>ACTTCT<br>AGAGAA<br>TGAGTT<br>C | Dyrk1a-<br>1-KO | GGAAGA<br>CAATAG<br>CAGGCA<br>TGCT | CTATGG<br>GTCTAG<br>AGCTCA<br>TG | GTA<br>CTTTC<br>AGTGT<br>GTTT<br>GTT | Dyrk1a-<br>1-WT | GCGTTT<br>CTGAAT<br>CAAGCC<br>CAGATA | AAGTGC<br>GGCTGC<br>TTGAGC<br>T | TCATTT<br>CAGTGT<br>CGTGTT<br>TGTTCA<br>TG |

**Table S6. Results of significant Levene's test and subsequent Welch's F statistic and Games-Howell test. M = male, F = female, WT = control/wildtype, Dp = triplicated Dp/Ts strain. Highlighted cells indicate significance was lost with the alternative analysis.**

[Click here to download Table S6](#)
